1 **Transposon expression in the *Drosophila* brain is**  
2 **driven by neighboring genes and diversifies the**  
3 **neural transcriptome**

4

5 Christoph D. Treiber\* & Scott Waddell\*

6 Centre for Neural Circuits and Behaviour, University of Oxford, Tinsley Building, Mansfield  
7 Road, Oxford OX1 3SR, UK

8 \*Correspondence.

9 Email: christoph.treiber@cncb.ox.ac.uk, scott.waddell@cncb.ox.ac.uk

10

11 Running title: Transposons diversify the neural transcriptome

12 Keywords: Transposon expression; alternative splicing; transcriptional heterogeneity; single-  
13 cell transcriptomics.

14 **Abstract**

15

16 Somatic transposition in neural tissue could contribute to neuropathology and individuality,  
17 but its prevalence is debated. We used single-cell mRNA sequencing to map transposon  
18 expression in the *Drosophila* midbrain. We found that neural transposon expression is driven  
19 by cellular genes. Every expressed transposon is resident in at least one cellular gene with a  
20 matching expression pattern. A new long-read RNA sequencing approach revealed that  
21 coexpression is a physical link in the form of abundant chimeric transposon-gene mRNAs.  
22 We identified 148 genes where transposons introduce cryptic splice sites into the nascent  
23 transcript and thereby produce many additional mRNAs. Some genes exclusively produce  
24 chimeric mRNAs with transposon sequence and on average transposon-gene chimeras  
25 account for 20% of the mRNAs produced from a given gene. Transposons therefore  
26 significantly expand the neural transcriptome. We propose that chimeric mRNAs produced  
27 by splicing into polymorphic transposons may contribute to functional differences between  
28 individual cells and animals.

## 29 **Introduction**

30 Transposons comprise almost half of every eukaryote genome (Britten and Kohne, 1968;  
31 International Human Genome Sequencing Consortium et al., 2001; Ketchum et al., 2000)  
32 and their mobilization in the germline contributes to chromosome evolution. Non-heritable *de*  
33 *novo* transposon activity in neural tissue has been proposed to contribute to functional  
34 heterogeneity in the brain and to neurological disease (Baillie et al., 2011; Coufal et al.,  
35 2009; Evrony et al., 2012; Kazazian, 2011; Kazazian and Moran, 2017; Muotri et al., 2005;  
36 Schauer et al., 2018). However, it is difficult to faithfully map rare *de novo* transposon  
37 insertions using whole-genome DNA sequencing (Baillie et al., 2011; Evrony et al., 2012,  
38 2016; Perrat et al., 2013; Treiber and Waddell, 2017; Upton et al., 2015). A growing number  
39 of studies have therefore correlated the development of neurodegeneration in animal models  
40 with changes in transposon expression (Guo et al., 2018; Krug et al., 2017; Li et al., 2013; Li  
41 et al., 2012; Sun et al., 2018). Using expression as a proxy for mobility could be misleading  
42 because high-level transposon expression does not appear to result in elevated *de-novo*  
43 somatic transposition in the brain (Evrony et al., 2012, 2016; Treiber and Waddell, 2017). It  
44 is therefore important to understand what controls the expression of transposon-derived  
45 sequences in the brain and whether their elevated expression relates to neural function.

46  
47 An early study of the human LINE-1 (L1) promoter demonstrated that its activity was heavily  
48 influenced by flanking cellular sequences, and concluded that expression of a given L1  
49 depended on its location in the genome (Lavie et al., 2004). Such a locus specific model  
50 could more generally explain the apparent cell-type restricted nature of transposon  
51 expression and mobilization in the brain. So far, studies of somatic transposon expression  
52 have either focused on single transposon families or have been based on bulk sequencing  
53 of tissues or cultured cells (Chung et al., 2019; Faulkner et al., 2009; Li et al., 2013; Philippe  
54 et al., 2016; Rangwala et al., 2009). However, answering this question on a brain- and  
55 genome-wide scale requires a means to relate the cellular expression of each transposon in  
56 the genome to that of their neighboring genes. Recent technical developments in whole-

57 genome DNA sequencing and high-throughput single-cell transcriptomics of complex tissues  
58 now make this possible (Macosko et al., 2015).

59

60 Here we used single-cell transcriptomics to map transposon expression to individual cells in  
61 the *Drosophila* midbrain. We found that many transposons are expressed with cell-specificity  
62 that is often highly correlated to that of a neighboring gene. A more detailed analysis  
63 revealed that >90% of transposon expression can be linked to co-expression with a host  
64 gene, indicating that these genes are the main driver of somatic transposon expression.  
65 Long-read sequencing showed that the transposon and neighboring gene are alternatively  
66 spliced together becoming part of the same chimeric mRNAs. Sometimes all mRNAs  
67 produced from a particular gene in which a transposon resides include transposon  
68 sequence. Therefore, transposons produce genome-wide diversification of cellular  
69 transcripts. Analysis of sequencing data produced from other fly strains demonstrated large  
70 differences in their chimeric transcriptomes. Inter-strain and individual differences in  
71 transposon complement therefore constrain the cellular specificity and likelihood of  
72 transposon-directed pathology.

## 73 **Results**

### 74 **Single-cell transcriptomics reveals cell-type restricted transposon expression**

75 The *Drosophila* genome contains 112 families of transposons and the number of an  
76 individual type varies from a few to hundreds of copies (Kaminker et al., 2002). Conventional  
77 single-cell RNAseq (scRNAseq) analysis pipelines typically discard sequencing reads that  
78 align to multiple genomic loci, and so they overlook transposon expression. We therefore  
79 devised an analysis pipeline to map the expression of all transposons within scRNAseq  
80 data. We masked all repetitive sequences in the reference genome and then added a single  
81 copy of the consensus sequence for every known transposon to the masked genome. In  
82 essence this produces a *Drosophila* reference genome with one copy of each type of  
83 transposon. We first used this modified reference genome to map transposon expression  
84 onto single cells of the midbrain prepared from a fly strain expressing mCherry in  $\alpha\beta$  Kenyon  
85 cells (KCs) of the mushroom body (MB); from here called  $\alpha\beta$ Cherry flies. We found evidence  
86 for expression of both the sense and the antisense strand of most transposons, which  
87 comprised 76.2 and 23.8% (+/- 1.7% SD) of all transposon expression, respectively  
88 (Supplemental figure 1). We first performed principal component decomposition of cellular  
89 genes and clustered cells from the midbrain by constructing a k-Nearest-Neighbor graph on  
90 the Euclidean distances in the PCA space, optimizing the modularity using the Louvain  
91 algorithm (Butler et al., 2018). This analysis grouped cells into many discrete clusters. We  
92 next assigned many of these clusters to cell types in the midbrain using the expression  
93 patterns of known marker genes (Croset et al., 2018) (Figure 1a). Displaying the expression  
94 of individual types of transposons on the cluster plot revealed that some transposons are up-  
95 regulated in specific cell types. For example, the long-terminal repeat (LTR)  
96 retrotransposons COPIA and NOMAD showed elevated expression in the  $\alpha\beta$ ,  $\alpha'\beta'$  and  $\gamma$   
97 Kenyon Cells (KCs) classes (Figure 1b, first graph) and  $\alpha'\beta'$  KCs (Figure 1c, first graph),  
98 respectively. Other LTR retrotransposons such as MICROPIA were upregulated in the  
99 ellipsoid body (Figure 1d, first graph) whereas BLOOD and 412 were higher in glia (Figure  
100 1e,f, first graphs).

**Figure 1**

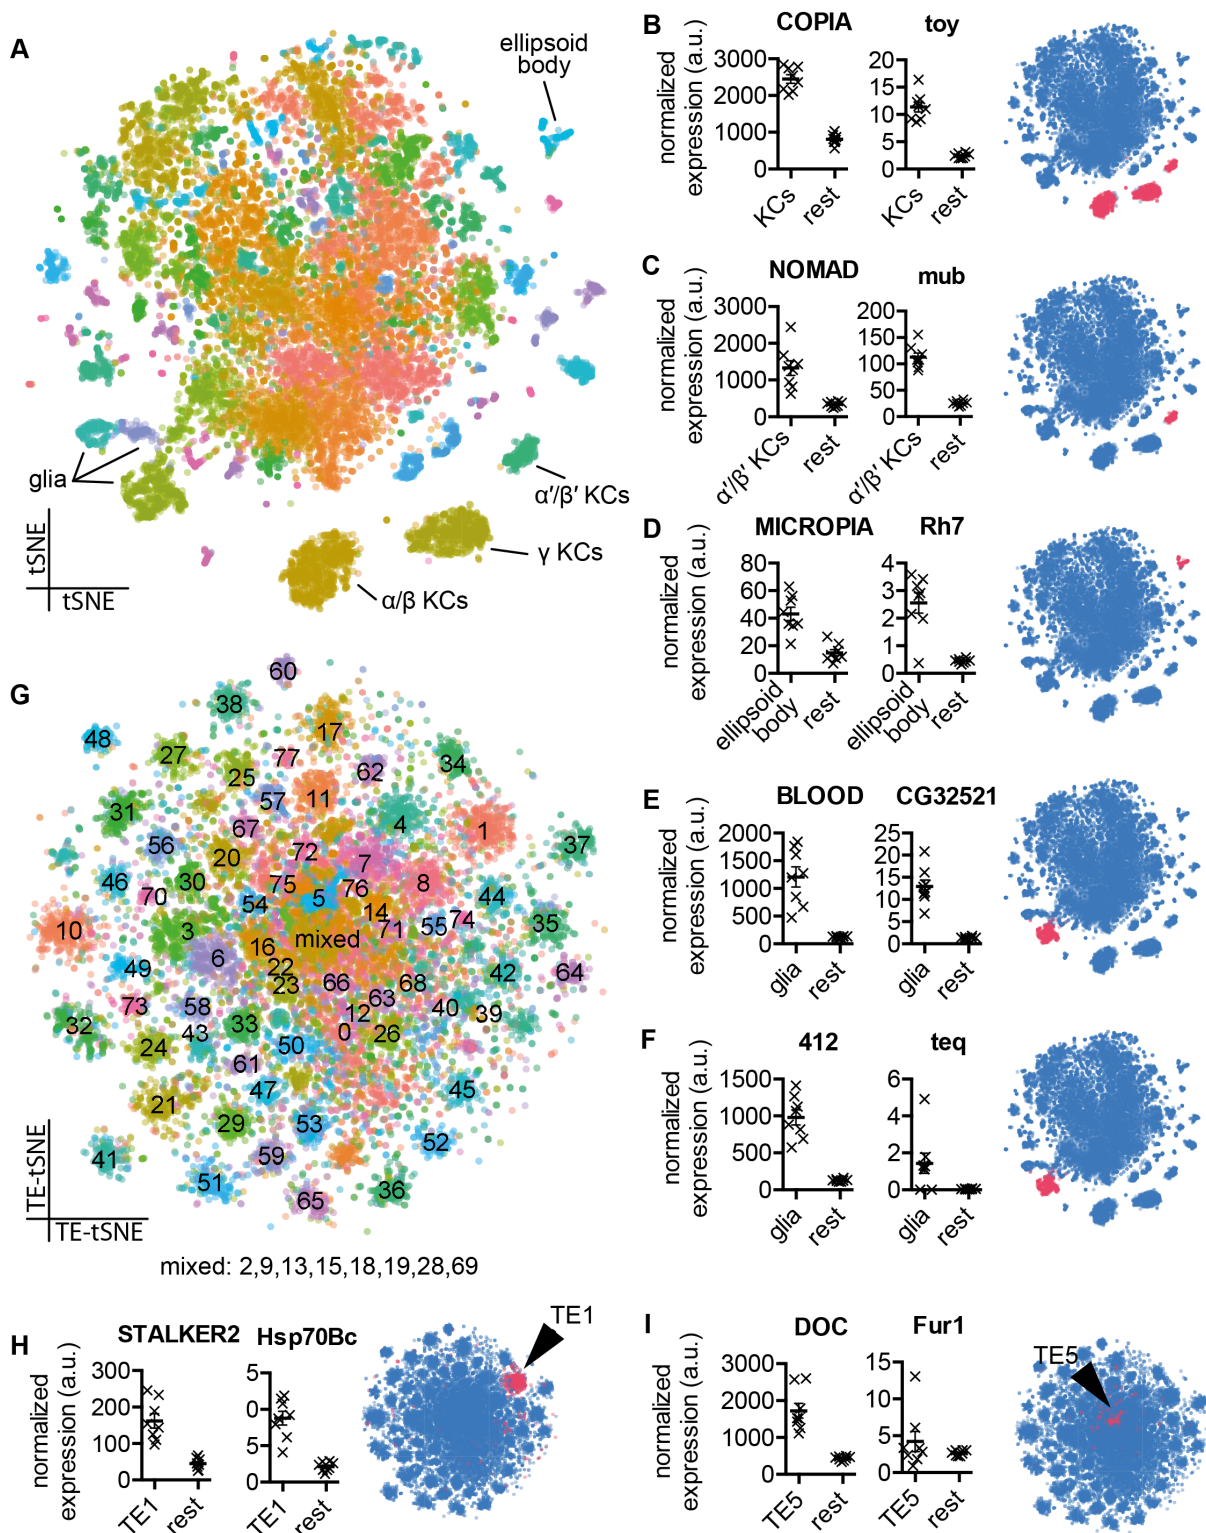

101

102 **Figure 1. Single-cell transcriptomics reveals patterned transposon expression in the**  
103 ***Drosophila* midbrain.**

104 **A** Two-dimensional reduction (tSNE) of 14,804 *Drosophila* midbrain cells, based on gene  
105 expression levels. Colors represent cell clusters (at SNN resolution of 3.5). **B-F** Mean  
106 expression of transposons and neighboring cellular genes in the relevant cell groups in 8  
107 biological replicates and tSNE representation of cell-type restricted expression. **B** COPIA  
108 and *twin-of-eyeless* (*toy*) in all Kenyon Cell (KC) classes. **C** NOMAD and *mushroom-body*  
109 *expressed* (*mub*) in  $\alpha'$  $\beta'$  KCs. **D** MICROPIA and *Rhodopsin 7* (*Rh7*) in the ellipsoid body **E**  
110 **and F** BLOOD and *CG32521*, and 412 and *tequila* (*teq*) in glia. Values represent the mean  
111 normalized number of unique molecular identifiers (UMI's) in an average cell from each cell  
112 type, and from the rest of the midbrain. Error bar indicates standard error of mean (SEM).  
113 Note that transposon- and gene levels were normalized separately. Blue schematic shows  
114 location of cell cluster (pink) in tSNE plot. **G** Two-dimensional reduction of 14,804 *Drosophila*  
115 midbrain cells, based exclusively on transposon expression levels. Colors represent cell  
116 clusters (at SNN resolution of 3.5). **H and I** Mean expression of STALKER2 and *Hsp70Bc*  
117 and DOC and *Furin 1* (*Fur1*) in their relevant transposon clusters and the position of the  
118 cluster in the overall transposon-based tSNE (indicated in pink).

119 **Transposon expression correlates with that of cellular genes they are inserted within.**

120 Transposons could be elevated in specific cell types because they are inserted in genes that  
121 are highly expressed in the same cells. To test this hypothesis, we re-used our previously  
122 published high-coverage gDNA sequence of  $\alpha\beta$ Cherry flies. We mapped all the germline  
123 transposon insertions in these flies using TEchim, a new custom-built transposon analysis  
124 program. TEchim first generates long nucleotide contigs from either gDNA or cDNA  
125 sequencing reads, then creates in-silico paired-end reads and screens them for cases where  
126 one in-silico end maps to a cellular gene and the mate read maps to a specific transposon.  
127 Since these paired-end reads are derived from contiguous sequences, TEchim permits one  
128 to subsequently refer back to the original long reads to determine the precise nucleotide  
129 sequence of the transposon-gene breakpoints. Using TEchim, we found copies of COPIA,  
130 NOMAD, MICROPIA, BLOOD and 412 inside the genes *twin-of-eyeless (toy)*, *mushroom-*  
131 *body expressed (mub)*, *Rhodopsin-7 (Rh7)*, *CG32521* and *tequila (teq)*, respectively. The  
132 expression of each of these genes mirrored the expression pattern of the transposon they  
133 harbored (Figure 1b-f, second graphs). The expression of these transposons in the brain of  
134  $\alpha\beta$ Cherry flies therefore appears to be driven by their relevant host genes.

135

136 We next tested whether all transposons exhibit patterned expression throughout the  
137 midbrain. We re-clustered the single-cell data of the fly using only transposon expression.  
138 This generated 78 cell clusters that mostly contained cells from all 8 biological replicates in  
139 the data (Figure 1g, Supplemental figure 2). This result suggests that transposon expression  
140 is stereotyped across samples derived from different flies collected from the same strain. We  
141 then analyzed the expression of cellular genes across the transposon clusters and found  
142 many clusters also preferentially expressed certain genes. For example, the cluster of cells  
143 expressing the LTR of STALKER2 was enriched for cells that also expressed the *Hsp70Bc*  
144 gene (Figure 1h), and cells in the DOC-positive cluster showed increased expression of  
145 *Furin1 (Fur1)*. By referring back to the gDNA, we found that  $\alpha\beta$ Cherry flies harbor a copy of  
146 STALKER2 within *Hsp70Bc* and a copy of the LINE-like DOC element inside *Fur1*. Again,



147 these data suggest that expression of STALKER2 and DOC is driven by a neighbouring  
148 gene.

149

### 150 **Quantitative analysis reveals high fidelity transposon-gene co-expression**

151 Our gDNA analysis also revealed many transposon insertions inside genes that were more  
152 broadly expressed across the brain. In total, we identified 1952 germline transposon  
153 insertions within genes. Of these, 881 cases were inserted in the sense direction to the open  
154 reading frame of the gene and 1071 were in the antisense orientation (Supplemental Table  
155 1). To quantify the correlated expression of transposons and cellular genes we devised a  
156 method based on the established Hardy-Weinberg principle for quantifying linkage  
157 equilibrium of two alleles in population genetics (Lewontin and Kojima, 1960) (Figure 2a).  
158 We first binarized our scRNAseq data to generate the equivalent of bi-allelic traits in a  
159 population. We then calculated the proportion of cells expressing a specific transposon,  
160 multiplied it by the proportion of cells expressing a certain gene, and then subtracted this  
161 value from the proportion of cells that expressed both the transposon and the gene. We  
162 termed this value the Coexpression Disequilibrium, CD. We also normalized these CD  
163 values to account for the variable abundance of each transposon and gene in every  
164 transposon-gene pair and repeated the analysis for all transposon-transposon and gene-  
165 gene pairs. These normalized values were then ranked within each of the 8 biological  
166 replicates. P-values were corrected for multiple comparisons and describe the probability  
167 that a transposon-gene pair would have such a highly ranked CD value across multiple  
168 replicates if they were expressed independently.

## Figure 2

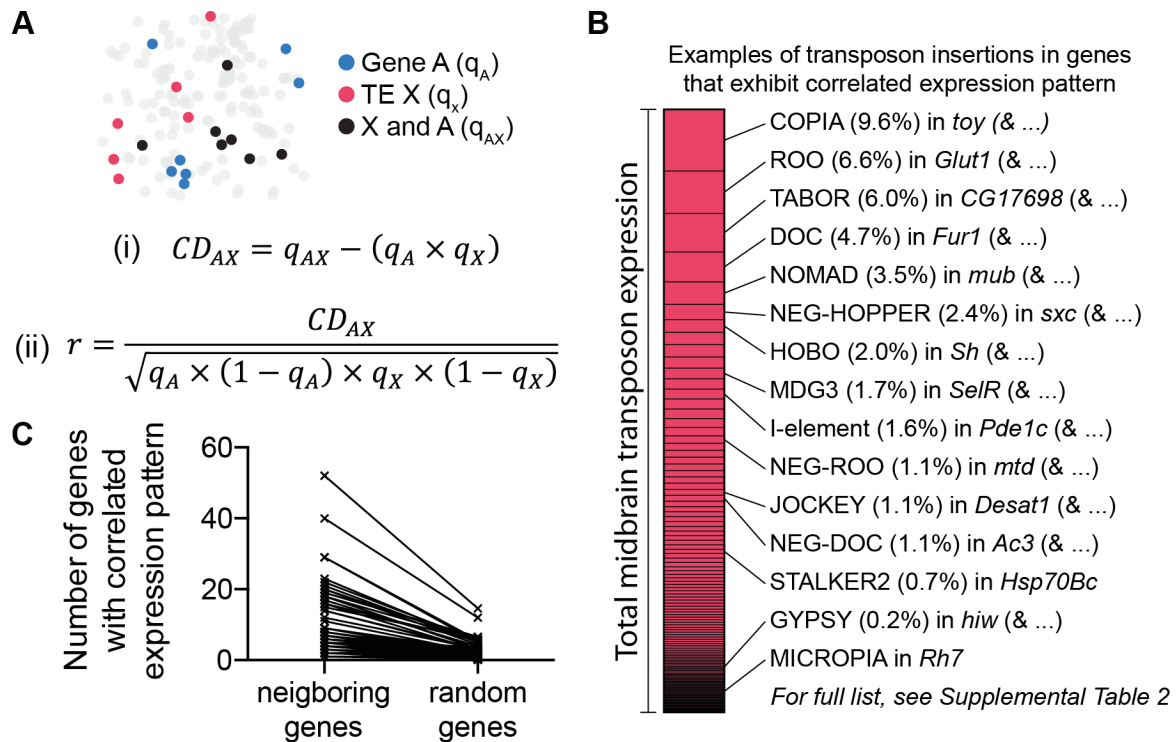

169

170

171 **Figure 2. Transposons are co-expressed with neighboring genes.**

172 **A** Schematic and formulae describing the calculation of Co-expression Disequilibrium

173 values. **B** Examples of transposon-gene pairs that are neighboring in the genome and co-

174 expressed across the midbrain. Pink bar represents the total transposon expression.

175 Examples are selected from the most highly expressing transposons. See Supplemental

176 Table 2 for entire list of correlated transposon-gene pairs. **C** Graph illustrating that more

177 neighboring genes are correlated with their resident transposons than if transposons are

178 randomly assigned to genes.

179 We combined the list of all germline transposon insertions in  $\alpha\beta$ Cherry flies with the  
180 scRNAseq data generated from the same population of flies and calculated the CD values  
181 between every transposon and the gene in which it was inserted. We tested every  
182 transposon that contributed at least 0.1% of the overall transposon expression in our  
183 midbrain  $\alpha\beta$ Cherry fly samples. This cut-off left 59 different transposons, 34 of which were  
184 expressed in both the sense- and the antisense direction, 22 only in sense, and 3 only in  
185 antisense (Figure 2b, Supplemental Table 2). For 56 of these transposons we found at least  
186 one copy inside a gene that exhibited a correlated expression pattern (Benjamini-Hochberg  
187 corrected p-val  $>0.05$ ). For those cases where the transposon was inserted in the same  
188 orientation as the transcription unit of the gene the expression of the sense strand of the  
189 transposon correlated to that of the gene. In contrast, the antisense strand of reverse  
190 orientation transposons was correlated with the host gene. Importantly, the average number  
191 of correlated genes for each transposon was significantly less if equivalent values were  
192 calculated using random assignment of transposons to host genes (Figure 2c). These  
193 analyses therefore demonstrate that the genomic locus strongly influences the expression  
194 patterns of almost all transposons in the fly brain. We did not identify a neighboring gene  
195 with a correlated expression pattern for the transposons TART-A, P-element and  
196 HMSBEAGLE. This is expected for TART-A, which is a telomeric retrotransposon, and for P-  
197 element, which is a remnant of transgenic intervention in  $\alpha\beta$ Cherry flies. It is conceivable  
198 that the HMSBEAGLE retrotransposon is the only element that is expressed independently  
199 of a cellular gene. However, despite our high coverage sequence of  $\alpha\beta$ Cherry flies we may  
200 have missed a germline HMSBEAGLE insertion that sits near a gene that is driving its  
201 expression.

202

### 203 **Transposons are exonized into cellular mRNAs**

204 Recent work has shown that mRNAs from the *Arc* gene contain transposon-like sequence in  
205 the coding sequence and 3' UTR (Pastuzyn et al., 2018; Zhang et al., 2015). We therefore  
206 tested whether chimeric mRNAs might occur more broadly and extend to all transposons.

207 We extracted mRNA from  $\alpha\beta$ Cherry fly heads and generated 250 basepair long reads which  
208 were screened using TEchim for chimeric reads. We also incorporated a function in TEchim  
209 that maintains strand-specificity of the input reads which enabled us to unambiguously  
210 assign chimera to cellular genes. This analysis revealed that a large number of transposons  
211 inside introns lead to the formation of chimeric mRNAs. In total, we found chimeric mRNA  
212 from 887 transposon insertions (Figure 3a, Supplemental Table 3). Chimera included  
213 sequences from LTR, LINE-like and DNA transposons attached to mRNAs from genes  
214 involved in a broad range of biological processes. For example, we found sequence from the  
215 LTR-retrotransposon Gypsy in transcripts of the ubiquitin gene *Ubi-P5E* and of the neuron  
216 specific ubiquitin ligase *highwire (hiw)*, the non-LTR element DOC in *Fur1*, encoding a  
217 synaptic membrane bound protease, and the TIR element HOB0 attached to transcripts  
218 from *Shaker*, which encodes a voltage-gated potassium channel (Izquierdo, 1994; Kaplan  
219 and Trout, 1969; Roebroek et al., 1991; Wan et al., 2000).

## Figure 3

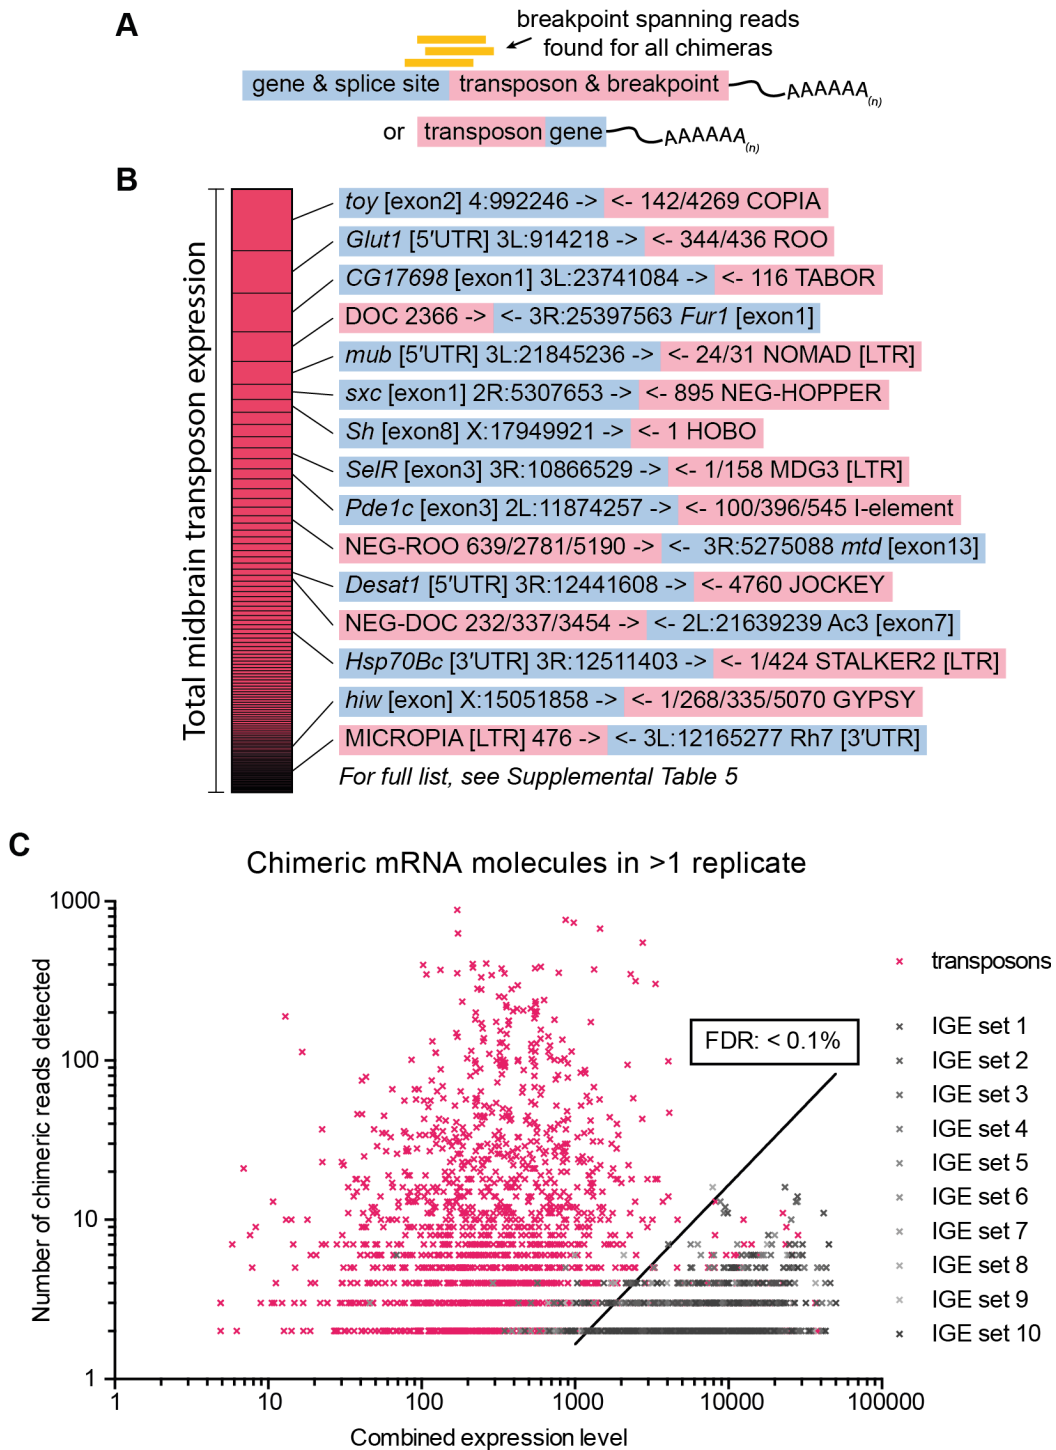

221 **Figure 3. Chimeric transposon-gene mRNA is abundant in the midbrain.**

222 **A** Schematic of the structure of chimeric mRNA molecules, and illustrating the data  
223 representation in **B**. **B** Examples of transposon-gene pairs that form chimeric mRNA. The  
224 blue box contains the gene name, the section of the gene that forms a chimera and the  
225 breakpoint, which is always the endogenous exon-intron junction. The red box contains the  
226 transposon name, and the breakpoint(s) on the transposon. Note that for consistency,  
227 transposon breakpoints are always taken from the sense orientation, starting from the core  
228 transposon sequence, unless specifically indicated as [LTR]. Examples shown here are the  
229 same transposon-gene pairs as in Figure 2b. For the entire list of chimera, see  
230 Supplemental Table 5. **C** Graph showing the number of chimeric reads, and the combined  
231 expression levels of each transposon-gene pair (pink), as well as for all 10 sets of IGE-gene  
232 pairs (grey). Combined expression levels are the square root of the product of reads in both  
233 transcripts of a transposon/IGE-gene pair. IGEs were used to calculate a threshold for a  
234 False Discovery Rate that is less than 0.1%.

235 Previous studies of chimeric sequencing reads have established that *in vitro* amplification of  
236 genetic material often leads to chimeric amplification artefacts (Evrony et al., 2016; Treiber  
237 and Waddell, 2017). It was thus important to account for similar errors in our data. We  
238 therefore calculated the rate of these artefacts in our mRNA data by selecting 10 sets of 167  
239 exons (with each set providing a number of sequences corresponding to the 112 different  
240 transposon types and 55 LTRs) with matching expression levels in the brain. These exons  
241 lack the ability to relocate in gDNA so we refer to them as immobile genetic elements (IGEs).  
242 Since IGEs should only occur as single copies in the gDNA from  $\alpha\beta$ Cherry, chimeric reads  
243 between IGEs and other genes most likely represent amplification artefacts. We found the  
244 rate of generating IGE chimeras was directly correlated to the expression level of the IGE  
245 and the gene that it formed a chimeric molecule with. Critically, the IGE chimera rate was  
246 substantially lower than that of chimera formed between genes and transposons. We  
247 therefore used the rate of IGE chimera to filter the transposon chimera detected using  
248 TEchim, defining a false discovery rate (FDR) of 0.1% (Figure 3b, Supplemental Table 3). All  
249 examples of chimeric transcripts that are presented in detail in this study have supporting  
250 evidence that exceeds this FDR.

251

### 252 **LTR retrotransposon expression is predominantly non-autonomously**

253 Given that transposon expression was highly correlated with at least one neighboring gene,  
254 we hypothesized that all transposon expression in the brain might occur as co-expression  
255 with cellular genes. To test this, we focused on LTR retrotransposons. We quantified the  
256 number of reads that spanned an LTR-gene breakpoint, and compared it to the number of  
257 reads that crossed the LTR-transposon breakpoint within the transposon (Figure 4a).  
258 Autonomously expressed, full-length transposons only generate the latter type of read, whilst  
259 non-autonomous expression should generate both kinds of reads, at varying proportions.  
260 We found that around 95% of the highly expressed LTR transposons produced a roughly  
261 equivalent number of gene-transposon and LTR-transposon reads, suggesting that LTR

262 transposons are expressed as chimeras with cellular genes, rather than being autonomously  
263 expressed (Figure 4b, Supplemental Table 4).



## Figure 4

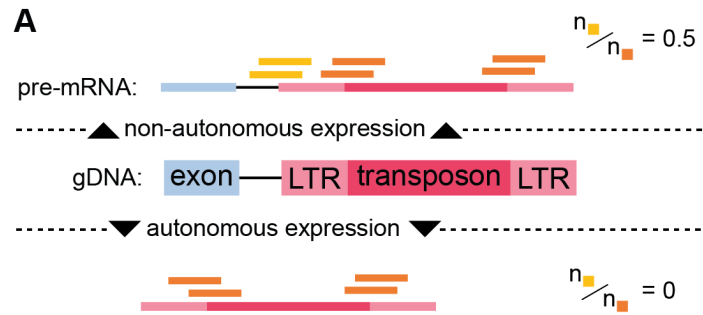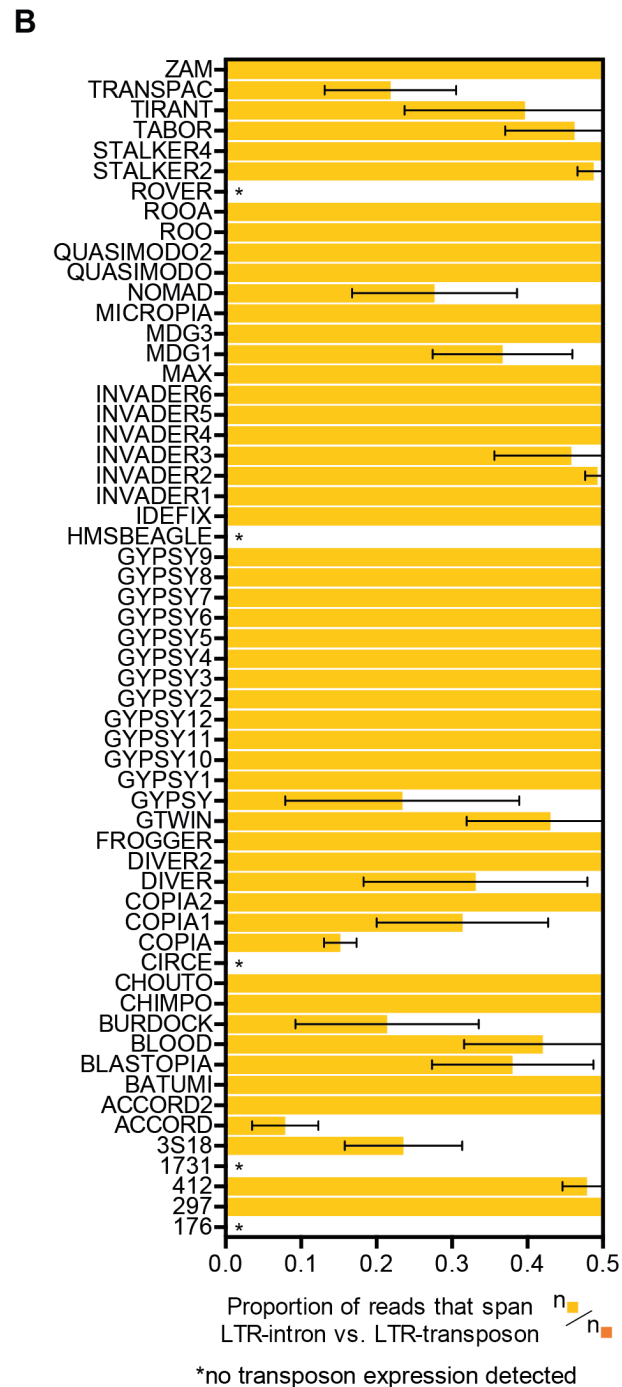

265 **Figure 4. LTR retrotransposon expression is predominantly non-autonomous**

266 **A** Illustration showing method of calculating the percentage of chimeric transcripts vs.  
267 autonomously expressed transposon transcripts. Non-autonomous expression should result  
268 in an approximate value of 0.5 for reads spanning the LTR section of transposons and the  
269 intron of a neighboring gene over the number of reads spanning the LTR and the core  
270 section of the transposon. In contrast, autonomous expression would not result in LTR-gene  
271 spanning reads. **B** List of all LTR transposons analyzed in our mRNA data. We identified  
272 LTR-gene spanning reads for every LTR transposon that is expressed in the midbrain. Error  
273 bars represent standard deviation. Values have been capped at 0.5 in this graph. However,  
274 some transposons produced a much higher number of LTR-gene reads (see Supplemental  
275 Table 4).

276 **Many transposons introduce cryptic alternative splice-sites into cellular genes**

277 Given the abundance of reads that span a gene-transposon breakpoint, we next investigated  
278 the structure of these transcripts in more detail. Our transposon mapping identified 887 loci  
279 with a germline transposon insertion in the intron of a gene. For each of these we found  
280 mRNA molecules where one section mapped to the beginning or end of the transposon and  
281 the other section corresponded to the flanking intronic sequence. These reads could  
282 represent nascent unspliced chimeric pre-mRNAs from which transposon-derived sequence  
283 could be removed by splicing to yield intact host mRNAs, and full-length transposon  
284 sequences. However, we also found 148 examples where breakpoint-spanning reads  
285 indicate that specific sections of transposon sequence are spliced into host-gene transcripts  
286 (Supplemental Table 5).

287

288 Analysis of the breakpoints inside transposons at these 148 sites revealed that chimera are  
289 formed at conserved locations in each type of transposon. For example, in cases where an  
290 antisense ROO resided within an intron, we found transcripts where the 3'-end of an  
291 upstream exon had formed a new phosphate bond to a section of ROO at positions 5460  
292 and 2094 at 19 and 3 different genomic loci, respectively, and also at several additional  
293 breakpoints with lower frequency (Figure 5a,b). In addition, we identified transcripts where  
294 sections of ROO were bound to the 5'-end of a downstream exon. We found breakpoints at  
295 position 5191 from 24 genes, two at 2783, and several others at unique positions (note that  
296 the numbering runs backward because it relates to the forward orientation of ROO).  
297 Whereas intronic antisense ROO provides gene-transposon breakpoints for 28 exons, and  
298 transposon-gene breakpoints for 33, intronic sense ROO only introduced 4 and 1 (Figure  
299 5c). Similarly, the LTR BLOOD also introduced more breakpoints when it was inserted in the  
300 antisense orientation relative to the host gene (14 vs. 6, Figure 5d,e).

## Figure 5

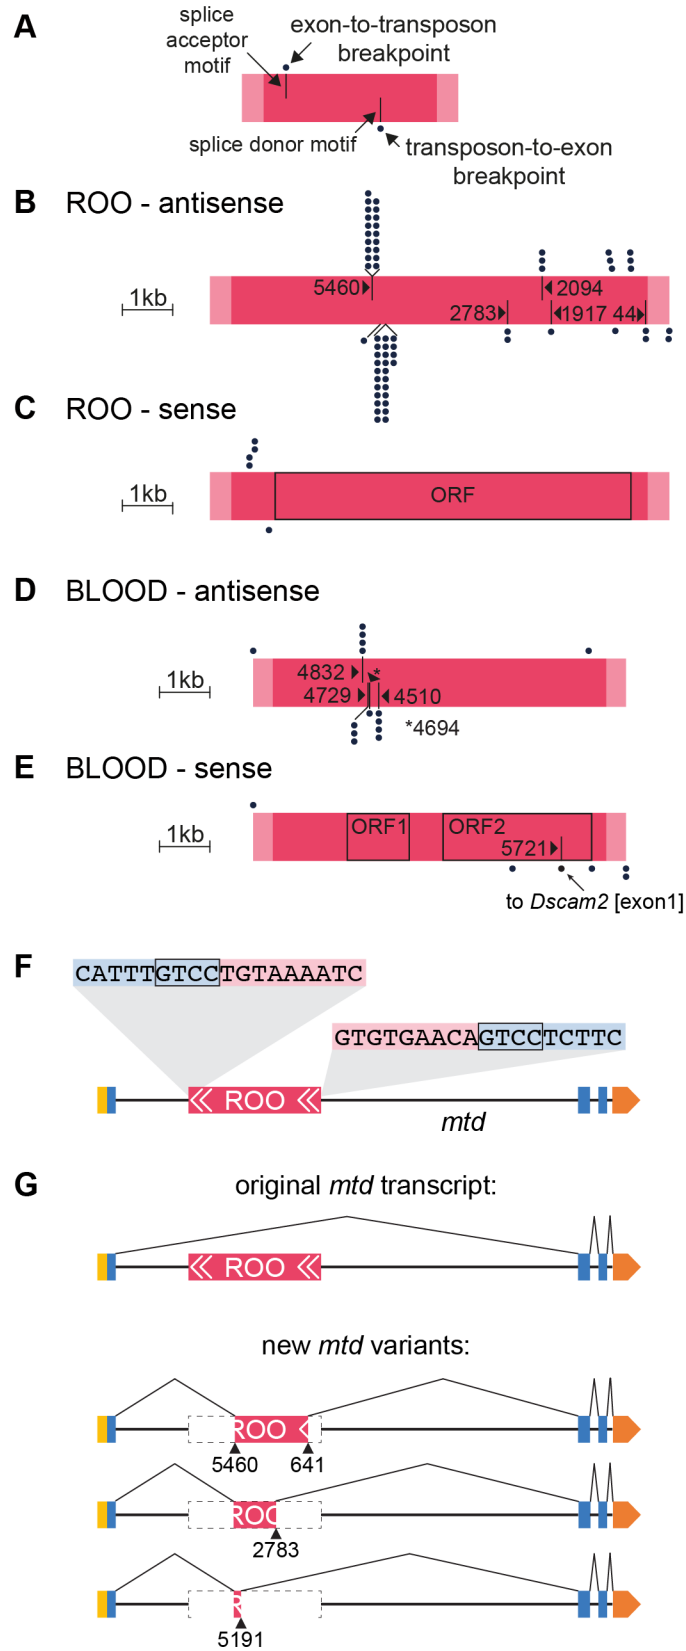

302 **Figure 5. Transposons introduce splice sites at conserved locations.**

303 **A** Illustration of the labelling scheme in panels **B-E**. The pink bar represents the transposon;  
304 light pink ends indicate the LTRs and the dark pink the core sequence. The positions of the  
305 dots above the bar represent the site on the transposon where an upstream exon splice  
306 donor site has merged. Every dot represents a different gene. Black lines in the top half of  
307 the pink bar represent splice acceptor (SA) motifs in the transposon. Dots below the pink bar  
308 indicate the location of breakpoints on the transposon that are spliced to upstream exonic  
309 SA sites of different genes. Bars in the lower half indicate splice donor (SD) motifs. **B-E**  
310 Representations of sense- and antisense ROO and BLOOD (to scale), with all breakpoints  
311 to SA and SD sites of neighboring genes. Note that the frequently used site on antisense  
312 ROO at position 5191 is a non-consensus SD site, which lacks the expected GT motif at the  
313 immediate breakpoint. The sequence around 5191 resembles the consensus SD motif,  
314 although the GT is a GC. Compare TTTGGCAAGTT to motif in Supplemental figure 3a. **F**  
315 Illustration of antisense ROO insertion in the *mustard* (*mtd*) gene. Only one isoform of *mtd* is  
316 shown. Yellow box represents the 5'UTR, blue boxes are exons, orange box the 3'UTR,  
317 pink represents ROO transposon with white arrows indicating the LTRs. Breakpoint-  
318 spanning gDNA reads reveal Target Site Duplication (TSD, inset). **G** Schematic of original  
319 *mtd* transcript, and of three new splice isoforms.

320 We screened the transposon sections around breakpoints for consensus splice- acceptor  
321 (SA) and donor (SD) sequence motifs and found many cases where the gene-to-transposon  
322 chimera had been formed at SA consensus motifs, and transposon-to-gene chimera at SD  
323 motifs (Stephens and Schneider, 1992) (Supplemental figure 3, Supplemental Table 6). For  
324 example, all breakpoints in antisense BLOOD that were formed with more than one exon  
325 were precisely located at the predicted SA and SD splice site (Figure 5d). Interestingly, we  
326 did not find a consensus SD motif at the transposon-gene breakpoint at position 5191 of  
327 antisense ROO, although it frequently provided 5' - sequence to transposon-gene chimeric  
328 RNAs. However, the sequence around position 5191 matched the consensus motif, with the  
329 exception of a GT-to-GC conversion (see Supplemental figure 3). Taken together, our  
330 analysis revealed that transposons introduce many alternative splice sites, which are  
331 recognized by the host cell spliceosome to combine cellular exonic sequences with sections  
332 of transposon sequence.

333

334 We also identified cases of alternative splicing to different sites within the same transposon  
335 insertion. Again using ROO as an example,  $\alpha\beta$ Cherry flies harbor a reverse orientation ROO  
336 in the intron between exons 10 and 11 of the pan-neurally expressed *mustard* (*mtd*) gene,  
337 which to date has only been implicated in fly innate immunity (Wang et al., 2012) (Figure 5f).  
338 RNAseq revealed a complex collection of *mtd* splice variants that incorporated different  
339 fragments of ROO (Figure 5g). SD sites upstream of this ROO came from the end of either  
340 *mtd* exon 11 or 13. and these spliced in to the corresponding SA at position 5462 within  
341 ROO (Figure 5g). We also found three different SD sites (at positions 641, 2784 and 5191)  
342 within ROO, which spliced out to the closest downstream SA (exon 6) of *mtd*. Therefore, this  
343 ROO element substantially increases the *mtd* mRNA isoform repertoire. Without ROO the  
344 *mtd* locus can express 23 isoforms whereas with ROO it can generate 68 differentially  
345 spliced mRNAs.

346

347 We identified 147 other genes whose transcript diversity was similarly increased by  
348 transposon insertions. These alternative transcripts incorporate 43 different transposon  
349 families which each introduce cryptic SA and/or SD sites into host genes (see Supplemental  
350 Table 5). For example, we found a sense insertion of BLOOD inside the *Dscam2* gene which  
351 encodes the transmembrane Down Syndrome cell adhesion molecule 2. Chimeric reads  
352 indicate that transcription of *Dscam2* is frequently initiated in BLOOD, which is then spliced  
353 into exon 33 (the second exon) of the gene. This splicing event combines ORF2 of BLOOD  
354 with the remaining exons of *Dscam2* and correctly aligns the reading frames of the two  
355 transcripts, generating a novel N-terminus (Supplemental figure 4). We also observed cases  
356 where transposon chimera resulted in exon skipping (e.g. the above mentioned ROO in *mtd*  
357 and 412 inside *tequila*, Supplemental figure 5). Most transposon chimera resulted from  
358 intronic insertions, but we also detected one case where a HOBO insertion resided in the  
359 exon of the *CG31705* gene. This HOBO introduced a cryptic SA site which was spliced to  
360 the upstream SD from the first exon, creating a truncated *CG31705* transcript (Supplemental  
361 figure 6). Together these data show that a broad range of *Drosophila* transposons are  
362 alternatively spliced into mRNAs producing many more isoforms of a large number of  
363 neurally expressed genes.

364

### 365 **Alternative splicing into and out of transposons can be highly penetrant**

366 Chimeric transcripts could be inconsequential to a cell if they only constitute a small  
367 percentage of the overall transcript repertoire of a given gene. We therefore quantified the  
368 percentage of mRNAs produced from a transposon harboring gene that include transposon  
369 sequence. To do this we analyzed sites where transposons were spliced into an exon-intron  
370 junction of a gene. For each gene we counted the number of reads spanning transposon-  
371 exon boundaries, and the number of reads that spanned the exon immediately up- and  
372 downstream of the transposon insertion (Figure 6a). This analysis showed that for some  
373 genes, all derived mRNAs contained transposon sequences. For example, all spliced copies  
374 of the isoform B of the Allatostatin A receptor 1 (*AstA-R1*) contained a section of ROO, and

375 every transcript of *Piezo-like (Pzl)*, a gene encoding a predicted mechanosensitive ion  
376 channel, ended in the I-element instead of exon 1 (Hu et al., 2019; Larsen et al., 2001). All  
377 mRNAs retrieved from *Mec2* contained TRANSPAC as the most 5' sequence, suggesting  
378 that transcripts might initiate within the TRANSPAC transposon and spliced to the SD of  
379 exon 2 of *Mec2*. On average, transposons contributed to 14% of transcripts derived from a  
380 specific gene (Figure 6b, Supplemental Table 7). Insertions in genes on the X chromosome,  
381 resulted in a higher average percentage of chimeric transcripts (27% vs. 13% for the rest of  
382 the genome) and a larger number of cases where 75% or more of transcripts were chimeric.  
383 Insertions on the X chromosome are hemizygous in male flies and our samples were  
384 generated by pooling an equal number of male and female flies. The increased chimera rate  
385 on the X might therefore reflect the smaller number of different X chromosomes when  
386 compared to the rest of the genome. For example, we found that the X-linked *cacophony*  
387 (*cac*) gene, which encodes a voltage-gated calcium channel, harbored a sense-orientation  
388 BLASTOPIA (Smith et al., 1996). This transposon insertion resulted in 54.7% of *cac*  
389 transcripts being truncated in  $\alpha\beta$ Cherry fly samples, potentially missing the last 8-11 coding  
390 exons, suggesting that many flies in this strain are likely mutant for the *cac* gene  
391 (Supplemental figure 7). Another interesting example on the X chromosome of  $\alpha\beta$ Cherry  
392 flies is *Beadex (Bx)* which encodes a long-term memory relevant LIM-type transcription  
393 factor (Hirano et al., 2016). A sense NOMAD insertion gives rise to at least two new *Bx*  
394 transcript isoforms (Supplemental figure 8), which constitute 9.8% of all *Bx* transcripts.



## Figure 6

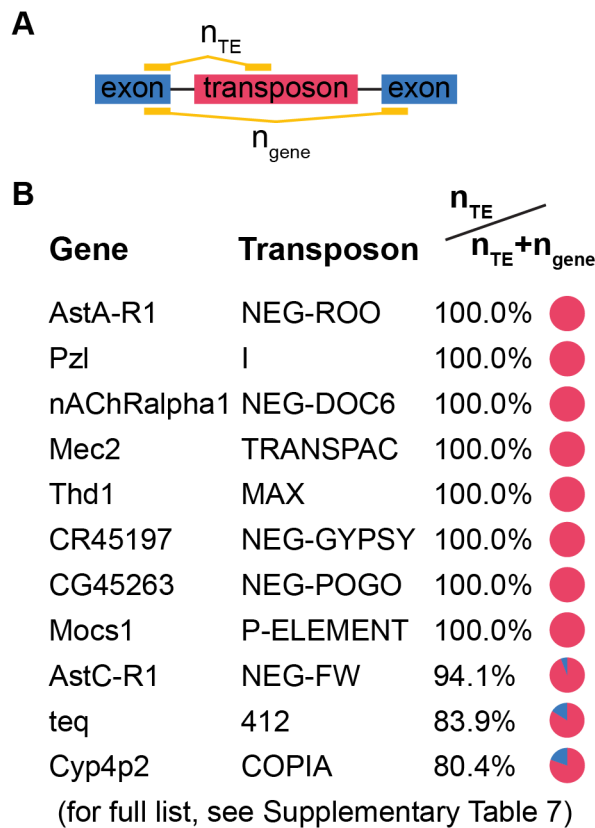

395

396

397 **Figure 6. High penetrance of transposon-containing splice isoforms.**

398 **A** Schematic showing method used to calculate the frequency of transposon chimera  
 399 produced from a given gene. The number of reads that span the exon-transposon junction  
 400 were divided by the total number of reads that map beyond the exon-intron junction (exon-  
 401 transposon reads plus reads that partially map to the exon immediately downstream of the  
 402 transposon insertion. **B** Examples of chimeric transposon-gene transcripts detected in fly  
 403 heads. Many genes are almost exclusively expressed as chimeric transcripts with  
 404 transposon sequence. See Supplemental Table 7 for complete list.

405 **Splicing into transposons is common and varies between strains**

406 The transposon complement is highly variable between fly strains. We therefore tested  
407 whether other fly strains express chimeric gene:transposon mRNAs by analyzing three  
408 previously published mRNA sequencing data sets (Croset et al., 2018; Daines et al., 2011;  
409 MacKay et al., 2012). Although these prior studies generated shorter paired-end RNAseq  
410 reads, than those collected here, we were still able to find chimeric mRNAs in all three data  
411 sets (Supplemental Table 8). Some transposon:gene chimera were conserved across all  
412 strains, whilst others appeared to be strain-specific. 318 of the 887 chimera identified in our  
413  $\alpha\beta$ Cherry flies were present in at least one of the three other data sets, whereas 120 of  
414 those occurred in at least three of the four strains. Chimera that were not detected in data  
415 from other strains could either reflect genomic heterogeneity between the tested fly strains,  
416 or the absence of evidence could result from lower sequencing coverage. Nevertheless,  
417 these results demonstrate the prevalence of cellular mRNAs containing transposon  
418 sequence.

## 419 **Discussion**

420 Somatic transposition in neurons has been proposed to contribute to age-dependent  
421 neuronal decline in wildtype and disease models of *Drosophila* and (Li, e al., 2013; Guo et  
422 al., 2018; Sun et al., 2018). Although the frequency of neural transposition is debated,  
423 expression is a prerequisite for movement. Therefore, transposons can only mobilize in cells  
424 that express full-length elements, or transposon mRNAs that encode enzymes permitting  
425 other elements to move in *trans*. It is therefore important to understand how transposon  
426 expression is controlled in the brain. Here, we combined single-cell expression data from the  
427 *Drosophila* midbrain with high-coverage gDNA sequence data of the same fly strain and find  
428 that the majority, if not all, expressed transposon sequences are parts of chimeric mRNAs  
429 with cellular genes.

430

431 Transposons residing in introns have previously been shown to contribute novel exons to  
432 several genes (Nekrutenko and Li, 2001). In addition long non-coding (lnc) RNAs frequently  
433 contain transposon sequences (Kapusta et al., 2013). We found transposon exonization to  
434 be highly prevalent in the *Drosophila* brain. Transposons within the coding regions of genes  
435 and those in introns dramatically increase the transcript repertoire by introducing new splice  
436 variants. At this stage it is difficult to definitively determine the whole-genome functional  
437 consequences of splicing into transposons because we most often only retrieve the  
438 sequence across the splice junctions. Furthermore, although each transposon has a known  
439 consensus sequence individual copies are highly polymorphic. Nevertheless, our  
440 sequencing shows that transposon exonization often truncates and/or changes the amino  
441 acid sequence of the encoded gene products, potentially changing protein structure and  
442 function. We did also identify several examples where the inclusion of transposon sequence  
443 conserved the reading frame of the host gene, likely generating a novel chimeric protein.  
444 Amongst the 148 transposon harboring genes identified in this study, there are several that  
445 we have described in detail for which the observed locus disruption and altered expression  
446 would be expected to have significant consequences for neural function. Flies harboring

447 HOBO in *Sh* and BLASTOPIA in *cac* might exhibit altered voltage-gated currents, whereas  
448 those with ROO in *AstA-R1* will respond differently to the modulatory Allatostatin A  
449 neuropeptide (Larsen et al., 2001; Smith et al., 1996). We also described insertions of 412 in  
450 *teq* and NOMAD in *Bx*, two genes which have been implicated in long-term memory  
451 formation (Didelot et al., 2006; Hirano et al., 2016).

452

453 Some transposons provide more splice sites than others. Our analysis of the abundant ROO  
454 retrotransposon (found in sense orientation inside 48 genes, and in antisense orientation  
455 inside 59 genes in our strain) provides a good example, and the insertion in *mtd* exemplifies  
456 the extended variance transposons can introduce to cellular transcription units. Interestingly,  
457 antisense insertions of ROO provide more potential SA and SD sites than sense orientation  
458 ROO. Insertions of ROO that are sense to the expression of the host gene were found to be  
459 mainly part of pre-mRNA, from which functional reverse transcriptase could potentially be  
460 translated. In contrast, antisense ROO introduces over 10 times more cryptic splice sites  
461 (compare Figure 5b and c).

462

463 mRNA molecules that contain transposon sequences might be susceptible to short-  
464 nucleotide mediated gene-silencing (Malone and Hannon, 2009), as recently reported for  
465 LINE-2 containing mRNAs and LINE-2 derived microRNAs in humans (Petri et al., 2019).  
466 This would provide a challenge for the cells expressing transposon-targeting piRNAs in  
467 differentiating between chimeric transcripts and full-length transposon sequences. It is worth  
468 noting that transposon-directed piRNAs have been identified in the fly brain (Li et al., 2009).  
469 It is therefore conceivable that transposon sequence permits cellular mRNAs to be  
470 selectively regulated. In addition, transposon sequence might confer the capacity to be  
471 specifically trafficked within the cell, and even between cells (Ashley et al., 2018; Pastuzyn  
472 et al., 2018).

473

474 The process of transposable elements acquiring new cellular functions that benefit the host  
475 cell is called transposon exaptation (Gould and Vrba, 2013). Several examples of exaptation  
476 events during the evolution of eukaryotes have been reported. How these functional  
477 transitions occur is, however, not fully understood (Joly-Lopez and Bureau, 2018). Stress-  
478 induced transposon mobilization has been observed in many species, and it has been  
479 hypothesized that these mobilization events trigger the formation of new transposon-gene  
480 chimera. Our results reveal a new mechanism by which transposons participate in the  
481 generation of new gene variants. We show that transposons do not need to mobilize in order  
482 to form chimeric mRNA molecules. Instead, the cellular gene splicing machinery frequently  
483 uses intronic transposon insertions to increase transcriptional diversity.

484

485 Transposon sequences in the gDNA can deliver enhancer elements to cellular genes and  
486 thereby influence their expression. However, our results do not support the idea that  
487 transposons provide enhancer sequences contributing to neural expression of neighboring  
488 genes. If this was the case, we would expect to have found that cellular genes that harbor  
489 the same type of transposon are more likely to be expressed in the same cells. Our data  
490 instead show that transposon expression is dictated by the genes they are inserted within.  
491 This is further supported by the fact that many genes that share transposon insertions with  
492 neurally expressed genes were not expressed in the brain.

493

494 Our studies also introduce important practical concerns for the analysis of transposon  
495 expression in somatic tissue and disease models. Several previous studies have used  
496 Quantitative PCR (qPCR) to measure levels of transposon expression in mutant flies and  
497 disease models. Since qPCR probes are usually not designed to cross transposon-gene  
498 breakpoints, they cannot distinguish autonomous transposon expression from chimeric  
499 mRNA (Guo et al., 2018; Li et al., 2013; Sun et al., 2018). Similarly, standard RNA  
500 sequencing protocols rely on the alignment of cDNA fragments to the reference genome and  
501 would not identify chimeric reads as non-autonomous transposon expression (e.g. De Cecco

502 et al., 2013). Baseline and changing cell-specific expression of host genes that form  
503 chimeric transcripts with transposons can therefore be misinterpreted as cell-restricted  
504 autonomous transposon expression and mobilization.

505

506 Our data also constrain somatic transposition. If all transposon expression depends on the  
507 neighboring host gene, only cells expressing that host gene can be susceptible to  
508 transposition of that element. This would mean that GYPSY could only be active in glia, if  
509 the fly strains being studied harbor a copy of GYPSY in a glial-expressed gene (Krug et al.,  
510 2017). Interestingly, although we found sense GYPSY sequences in mRNAs for 14 different  
511 genes, we did not detect glial GYPSY expression in our  $\alpha\beta$ Cherry flies.

512

513 Analysis of RNA-seq data from other fly strains suggests that more than half of the chimeric  
514 transposon transcripts we identified in  $\alpha\beta$ Cherry flies are unique to this strain. This finding  
515 alone demonstrates the incredible heterogeneity of the transposon complement between  
516 strains. In addition, our prior genome sequencing revealed large differences between  
517 individual  $\alpha\beta$ Cherry flies (Treiber and Waddell, 2017). Given the broad range of target genes  
518 that we have identified to form chimeric mRNA with transposable elements, it will be  
519 important to understand the functional consequences of fixed and variable transposons  
520 inside genes for the host organism. Nevertheless, it seems highly likely that polymorphism of  
521 transposon load and the distribution of transposons across the host genome could contribute  
522 towards heterogeneity of neural function, and neurological pathology, between individual  
523 animals.

## 524 **Methods**

525

### 526 **Fly strains**

527 All experiments were performed on  $\alpha\beta$ Cherry flies, which were generated by crossing  
528 MB008b females (Aso et al., 2014) with *w<sup>-</sup>; +; UAS-mCherry* males. Flies were raised on  
529 standard molasses food at 25°C, 40-50% humidity and 12 h:12 h light-dark cycles.

530

### 531 **Long-read mRNA sequencing**

532 For RNA extraction, groups of ~50 flies were frozen in liquid nitrogen and vortexed for 6 x 30  
533 s to separate heads from abdomens. Heads were isolated using a sieve. To avoid gDNA  
534 contamination, mRNA was purified with a combination of protocols. Samples were first  
535 processed with a column-based kit (RNeasy Mini kit, Qiagen, UK), including the optional on-  
536 column DNaseI digestion. Next, mRNA was extracted from total RNA using oligo-dT  
537 magnetic beads (NEB, Ipswich, MA) and the mRNA was purified again using the RNA  
538 columns. Finally, sequencing libraries were generated using oligo-dT magnetic beads from a  
539 strand-specific mRNA library preparation kit (TruSeq, Illumina, San Diego, CA), with 17  
540 cycles of PCR amplification. Fragmentation was optimized to obtain ~350nt long fragments.  
541 Whole-genome sequencing was performed on a HiSeq 2500, with 250nt paired-end reads.  
542 We mapped the long reads using MRTemp, as previously described (Treiber and Waddell,  
543 2017).

544

### 545 **Single-cell read alignments**

546 The *Drosophila melanogaster* reference genome release 6.25 was used for all sequence  
547 alignments. Transposon reference sequences were taken from Repbase (Jurka, 2000;  
548 Kaminker et al., 2002). Repetitive sequences in the *Drosophila* reference genome were  
549 masked using Repeatmasker (Smit et al. ). Single-cell sequencing data was processed with  
550 a custom-built data processing pipeline, which is available on GitHub. The masked reference

551 genome, as well as a gene reference file (refFlat) with all genes and each unique reference  
552 transposon sequence is provided as supplemental data.

553

### 554 **Single-cell data analysis**

555 Digital Gene Expression (DGE) matrices were generated as previously described (Butler et  
556 al., 2018). Rscripts can be downloaded as supplemental file 1. In summary, DGE's were  
557 filtered ( $\geq 800$  UMIs,  $\geq 400$  features) and 8 replicates were merged. Gene and transposon  
558 expressions levels were normalized separately. Marker genes were taken from Croset et al.  
559 (2018).

560

### 561 **Co-expression analysis**

562 Co-expression was quantified by calculating the Co-expression Disequilibrium (CD, see  
563 main text). The R-code snippet is available through GitHub. For the statistical analysis, a  
564 non-parametric test was performed. CD values between every gene- and transposon  
565 combination were ranked within each biological replicate, p-values were calculated using the  
566 student t-test and corrected for multiple comparisons using the Benjamini-Hochberg  
567 correction. In addition, CD values were calculated for every tested transposon with a set of  
568 10 randomly assigned genes (or transposons).

569

### 570 **Mapping germline transposon insertions in the fly**

571 Germline transposon insertions were mapped with single-nucleotide resolution using  
572 previously published gDNA data from the  $\alpha\beta$ Cherry fly strain and MRTemp (Treiber and  
573 Waddell, 2017). A new, purpose-built, multi-functional sequence analysis pipeline called  
574 TEchim was developed. TEchim has 5 key functions: 1. generation of support files, including  
575 a masked reference genome and endogenous intron-exon junctions. (input files: reference  
576 genome, list of genes, list of transposon sequences). 2. alignment of un-stranded genomic  
577 DNA sequence data of multiple sequencing lanes and multiple biological replicates,  
578 detection of chimeric sequence fragments with single-nucleotide resolution, and the



579 generation of summary output tables. 3. alignment of stranded cDNA data, detection of  
580 chimeric fragments, quantification of reads 4. generation of matching immobile genetic  
581 elements (IGE, see main text), analysis of these IGEs. These data are then used to  
582 determine sample-specific detection thresholds. 5. Quantification of LTR-gene and LTR-  
583 transposon reads (see Figure 4). Detailed descriptions and manuals are available on Github.

584

#### 585 **Splice acceptor (SA) and donor (SD) motif analysis**

586 SA and SD motifs in the *Drosophila melanogaster* reference genome were generated by  
587 randomly selecting 500 known SA and SD sites from exons and screening for motifs in these  
588 sequences using the MEME suite (Bailey and Elkan, 1994) (Supplemental figure 3). These  
589 motifs were then searched in sequence sections across transposon-gene breakpoints using  
590 FIMO (Grant et al., 2011).

591

#### 592 **Data from previously published studies**

593 Raw single-cell sequencing reads from Croset et al. (2018) was obtained from the NCBI  
594 Short Read Archive (SRA <https://www.ncbi.nlm.nih.gov/sra>) with the accession number:  
595 PRJNA428955. Genomic DNA data from Treiber and Waddell (2017) was obtained from the  
596 Dryad Digital Repository (<https://doi.org/10.5061/dryad.fd930>).

597 **Data Access**

598 All processed data is presented in Supplemental Tables 1-8. All raw sequencing data  
599 generated in this study have been submitted to the NCBI SRA with the BioProject ID  
600 PRJNA588978. Custom-built software packages can be accessed via GitHub  
601 (<https://github.com/charlieforia/TEchim> and  
602 <https://github.com/charlieforia/scHardyWeinberg>)

603

604 **Acknowledgements**

605 We are grateful to other members of the Waddell group for discussion. CT was supported by  
606 a Wellcome Trust DPhil studentship. SW is funded by a Wellcome Principal Researcher  
607 Fellowship (200846/Z/16/Z), Gatsby Charitable Foundation (GAT3237), ERC Advanced  
608 Grant (789274) and Bettencourt–Schueller Foundations.

609

610 **Author Contributions**

611 C.D.T. and S.W. conceived the project and wrote the manuscript. C.D.T. performed and  
612 analyzed all experiments.

613

614 **Disclosure declaration**

615 Both authors declare no financial and non-financial competing interests.

616 **References**

617

618 Ashley, J., Cordy, B., Lucia, D., Fradkin, L.G., Budnik, V., and Thomson, T. (2018).  
619 Retrovirus-like Gag Protein Arc1 Binds RNA and Traffics across Synaptic Boutons. *Cell* 172,  
620 262-274.e11.

621 Aso, Y., Hattori, D., Yu, Y., Johnston, R.M., Iyer, N.A., Ngo, T.T.B., Dionne, H., Abbott, L.F.,  
622 Axel, R., Tanimoto, H., et al. (2014). The neuronal architecture of the mushroom body  
623 provides a logic for associative learning. *Elife* 3, e04577.

624 Bailey, T.L., and Elkan, C. (1994). Fitting a mixture model by expectation maximization to  
625 discover motifs in biopolymers. *Proceedings. Int. Conf. Intell. Syst. Mol. Biol.* 2, 28–36.

626 Baillie, J.K., Barnett, M.W., Upton, K.R., Gerhardt, D.J., Richmond, T.A., De Sapio, F.,  
627 Brennan, P., Rizzu, P., Smith, S., Fell, M., et al. (2011). Somatic retrotransposition alters the  
628 genetic landscape of the human brain. *Nature* 479, 534–537.

629 Britten, R.J., and Kohne, D.E. (1968). Repeated sequences in DNA. Hundreds of thousands  
630 of copies of DNA sequences have been incorporated into the genomes of higher organisms.  
631 *Science* 161, 529–540.

632 Butler, A., Hoffman, P., Smibert, P., Papalexi, E., and Satija, R. (2018). Integrating single-  
633 cell transcriptomic data across different conditions, technologies, and species. *Nat.*  
634 *Biotechnol.* 36, 411–420.

635 De Cecco, M., Criscione, S.W., Peterson, A.L., Neretti, N., Sedivy, J.M., and Kreiling, J.A.  
636 (2013). Transposable elements become active and mobile in the genomes of aging  
637 mammalian somatic tissues. *Aging (Albany. NY)*. 5, 867–883.

638 Chung, N., Jonaid, G.M., Quinton, S., Ross, A., Sexton, C.E., Alberto, A., Clymer, C.,  
639 Churchill, D., Navarro Leija, O., and Han, M. V. (2019). Transcriptome analyses of tumor-  
640 adjacent somatic tissues reveal genes co-expressed with transposable elements. *Mob. DNA*  
641 10, 1–22.

642 Coufal, N.G., Garcia-Perez, J.L., Peng, G.E., Yeo, G.W., Mu, Y., Lovci, M.T., Morell, M.,  
643 O'Shea, K.S., Moran, J. V., and Gage, F.H. (2009). L1 retrotransposition in human neural

644 progenitor cells. *Nature* *460*, 1127–1131.

645 Croset, V., Treiber, C.D., and Waddell, S. (2018). Cellular diversity in the *Drosophila*  
646 midbrain revealed by single-cell transcriptomics. *eLife* *7*, e34550.

647 Daines, B., Wang, H., Wang, L., Li, Y., Han, Y., Emmert, D., Gelbart, W., Wang, X., Li, W.,  
648 Gibbs, R., et al. (2011). The *Drosophila melanogaster* transcriptome by paired-end RNA  
649 sequencing. *Genome Res.* *21*, 315–324.

650 Didelot, G., Molinari, F., Tche, P., Comas, D., Milhiet, E., Munnich, A., Colleaux, L., and  
651 Preat, T. (2006). Regulates Long-Term Memory Formation in *Drosophila*. *Science* *313*, 851–  
652 853.

653 Evrony, G.D., Cai, X., Lee, E., Hills, L.B., Elhosary, P.C., Lehmann, H.S., Parker, J.J.,  
654 Atabay, K.D., Gilmore, E.C., Poduri, A., et al. (2012). Single-neuron sequencing analysis of  
655 I1 retrotransposition and somatic mutation in the human brain. *Cell* *151*, 483–496.

656 Evrony, G.D., Lee, E., Park, P.J., and Walsh, C.A. (2016). Resolving rates of mutation in the  
657 brain using single-neuron genomics. *Elife* *5*, e12966

658 Faulkner, G.J., Kimura, Y., Daub, C.O., Wani, S., Plessy, C., Irvine, K.M., Schroder, K.,  
659 Cloonan, N., Steptoe, A.L., Lassmann, T., et al. (2009). The regulated retrotransposon  
660 transcriptome of mammalian cells. *Nat. Genet.* *41*, 563–571.

661 Gould, S.J., and Vrba, E.S. (2013). Exaptation-A Missing Term in the Science of Form  
662 Exaptation-a missing term in the science of form. *Paleobiology* *8*, 4–15.

663 Grant, C.E., Bailey, T.L., and Noble, W.S. (2011). FIMO: Scanning for occurrences of a  
664 given motif. *Bioinformatics* *27*, 1017–1018.

665 Guo, C., Jeong, H.H., Hsieh, Y.C., Klein, H.U., Bennett, D.A., De Jager, P.L., Liu, Z., and  
666 Shulman, J.M. (2018). Tau Activates Transposable Elements in Alzheimer’s Disease. *Cell*  
667 *Rep.* *23*, 2874–2880.

668 Hirano, Y., Ihara, K., Masuda, T., Yamamoto, T., Iwata, I., Takahashi, A., Awata, H.,  
669 Nakamura, N., Takakura, M., Suzuki, Y., et al. (2016). Shifting transcriptional machinery is  
670 required for long-term memory maintenance and modification in *Drosophila* mushroom  
671 bodies. *Nat. Commun.* *7*, 1–14.

- 672 Hu, Y., Wang, Z., Liu, T., and Zhang, W. (2019). Piezo-like Gene Regulates Locomotion in  
673 *Drosophila* Larvae. *Cell Rep.* 26, 1369-1377.e4.
- 674 International Human Genome Sequencing Consortium, Eric S. Lander, Lauren M. Linton,  
675 Bruce Birren, Chad Nusbaum, Michael C. Zody, Jennifer Baldwin, Keri Devon, Ken Dewar,  
676 and Michael Doyle (2001). Initial sequencing and analysis of the human genome. *Nature*  
677 409, 860–921.
- 678 Izquierdo, M. (1994). Ubiquitin genes and ubiquitin protein location in polytene  
679 chromosomes of *Drosophila*. *Chromosoma* 103, 193–197.
- 680 Joly-Lopez, Z., and Bureau, T.E. (2018). Exaptation of transposable element coding  
681 sequences. *Curr. Opin. Genet. Dev.* 49, 34–42.
- 682 Jurka, J. (2000). Repbase Update: A database and an electronic journal of repetitive  
683 elements. *Trends Genet.* 16, 418–420.
- 684 Kaminker, J.S., Bergman, C.M., Kronmiller, B., Carlson, J., Svirskas, R., Patel, S., Frise, E.,  
685 Wheeler, D.A., Lewis, S.E., Rubin, G.M., et al. (2002). The transposable elements of the  
686 *Drosophila melanogaster* euchromatin: a genomics perspective. *Genome Biol* 3(12).
- 687 Kaplan, W.D., and Trout, W.E. (1969). The behavior of four neurological mutants of  
688 *Drosophila*. *Genetics* 61, 399–409.
- 689 Kapusta, A., Kronenberg, Z., Lynch, V.J., Zhuo, X., Ramsay, L.A., Bourque, G., Yandell, M.,  
690 and Feschotte, C. (2013). Transposable Elements Are Major Contributors to the Origin,  
691 Diversification, and Regulation of Vertebrate Long Noncoding RNAs. *PLoS Genet.* 9.
- 692 Kazazian, H.H. (2011). Mobile DNA transposition in somatic cells. *BMC Biol.* 9, 2–5.
- 693 Kazazian, H.H., and Moran, J. V. (2017). Mobile DNA in health and disease. *N. Engl. J.*  
694 *Med.* 377, 361–370.
- 695 Ketchum, K., Ketchum, K., Hoskins, R., Hoskins, R., Wang, X., Wang, X., Smith, T., Smith,  
696 T., Gocayne, J., Gocayne, J., et al. (2000). The genome sequence of *Drosophila*  
697 *melanogaster*. *Science* 287, 2185–2195.
- 698 Krug, L., Chatterjee, N., Borges-Monroy, R., Hearn, S., Liao, W.W., Morrill, K., Prazak, L.,  
699 Rozhkov, N., Theodorou, D., Hammell, M., et al. (2017). Retrotransposon activation

700 contributes to neurodegeneration in a *Drosophila* TDP-43 model of ALS. *PLoS Genet.*  
701 13(3):e1006635

702 Larsen, M.J., Burton, K.J., Zantello, M.R., Smith, V.G., Lowery, D.L., and Kubiak, T.M.  
703 (2001). Type A allatostatins from *Drosophila melanogaster* and *Diptera punctata* activate  
704 two *Drosophila* allatostatin receptors, DAR-1 and DAR-2, expressed in CHO cells. *Biochem.*  
705 *Biophys. Res. Commun.* 286, 895–901.

706 Lavie, L., Maldener, E., Brouha, B., Meese, E.U., and Mayer, J. (2004). The human L1  
707 promoter: Variable transcription initiation sites and a major impact of upstream flanking  
708 sequence on promoter activity. *Genome Res.* 14, 2253–2260.

709 Lewontin, R.C., and Kojima, K. (1960). The Evolutionary Dynamics of Complex  
710 Polymorphisms. *Evolution* (N. Y). 14, 458–472.

711 Li, W., Prazak, L., Chatterjee N., Grüniger, S., Krug, L., Theodorou, D., Dubnau, J. (2013).  
712 Activation of transposable elements during aging and neuronal decline in *Drosophila*.  
713 *Neurosci. Nat.* 16, 529–531.

714 Li, C., Vagin, V. V., Lee, S., Xu, J., Ma, S., Xi, H., Seitz, H., Horwich, M.D., Syrzycka, M.,  
715 Honda, B.M., et al. (2009). Collapse of Germline piRNAs in the Absence of Argonaute3  
716 Reveals Somatic piRNAs in Flies. *Cell* 137, 509–521.

717 Li, W., Jin, Y., Prazak, L., Hammell, M., and Dubnau, J. (2012). Transposable Elements in  
718 TDP-43-Mediated Neurodegenerative Disorders. *PLoS One* 7, 1–10.

719 MacKay, T.F.C., Richards, S., Stone, E.A., Barbadilla, A., Ayroles, J.F., Zhu, D., Casillas, S.,  
720 Han, Y., Magwire, M.M., Cridland, J.M., et al. (2012). The *Drosophila melanogaster* Genetic  
721 Reference Panel. *Nature* 482, 173–178.

722 Macosko, E.Z., Basu, A., Satija, R., Nemesh, J., Shekhar, K., Goldman, M., Tirosh, I.,  
723 Bialas, A.R., Kamitaki, N., Martersteck, E.M., et al. (2015). Highly parallel genome-wide  
724 expression profiling of individual cells using nanoliter droplets. *Cell* 161, 1202–1214.

725 Malone, C.D., and Hannon, G.J. (2009). Small RNAs as Guardians of the Genome. *Cell* 136,  
726 656–668.

727 Muotri, A.R., Chu, V.T., Marchetto, M.C.N., Deng, W., Moran, J. V., and Gage, F.H. (2005).

728 Somatic mosaicism in neuronal precursor cells mediated by L1 retrotransposition. *Nature*  
729 *435*, 903–910.

730 Nekrutenko, A., and Li, W.H. (2001). Transposable elements are found in a large number of  
731 human protein-coding genes. *Trends Genet.* *17*, 619–621.

732 Pastuzyn, E.D., Day, C.E., Kearns, R.B., Kyrke-Smith, M., Taibi, A. V., McCormick, J.,  
733 Yoder, N., Belnap, D.M., Erlendsson, S., Morado, D.R., et al. (2018). The Neuronal Gene  
734 *Arc* Encodes a Repurposed Retrotransposon Gag Protein that Mediates Intercellular RNA  
735 Transfer. *Cell* *172*, 275-288.e18.

736 Perrat, P.N., Dasgupta, S., Wang, J., Theurkauf, W., Weng, Z., Rosbash, M., and Waddell,  
737 S. (2013). Transposition-driven heterogeneity in the *Drosophila* Brain. *Science* *340*, 91–96.

738 Petri, R., Brattås, P.L., Sharma, Y., Jönsson, M.E., Pircs, K., Bengzon, J., and Jakobsson, J.  
739 (2019). LINE-2 transposable elements are a source of functional human microRNAs and  
740 target sites. *PLOS Genet.* *15*, e1008036.

741 Philippe, C., Vargas-Landin, D.B., Doucet, A.J., Van Essen, D., Vera-Otarola, J., Kuciak, M.,  
742 Corbin, A., Nigumann, P., and Cristofari, G. (2016). Activation of individual L1  
743 retrotransposon instances is restricted to cell-type dependent permissive loci. *Elife* *5*,  
744 e13926

745 Rangwala, S.H., Zhang, L., and Kazazian, H.H. (2009). Many LINE1 elements contribute to  
746 the transcriptome of human somatic cells. *Genome Biol.* *10*, 1–18.

747 Roebroek, A.J.M., Pauli, I.G.L., Zhang, Y., and van de Ven, W.J.M. (1991). cDNA sequence  
748 of a *Drosophila melanogaster* gene, *Dfur1*, encoding a protein structurally related to the  
749 subtilisin-like proprotein processing enzyme furin. *FEBS Lett.* *289*, 133–137.

750 Schauer, S.N., Carreira, P.E., Shukla, R., Gerhardt, D.J., Gerdes, P., Sanchez-Luque, F.J.,  
751 Nicoli, P., Kindlova, M., Ghisletti, S., Dos Santos, A.D., et al. (2018). L1 retrotransposition is  
752 a common feature of mammalian hepatocarcinogenesis. *Genome Res.* *28*, 639–653.

753 Smit, A.F.A., Hubley, R., and Green, P. RepeatMasker.

754 Smith, L.A., Wang, X.J., Peixoto, A.A., Neumann, E.K., Hall, L.M., and Hall, J.C. (1996). A  
755 *Drosophila* calcium channel  $\alpha 1$  subunit gene maps to a genetic locus associated with

756 behavioral and visual defects. *J. Neurosci.* *16*, 7868–7879.

757 Stephens, R.M., and Schneider, T.D. (1992). Features of spliceosome evolution and function  
758 inferred from an analysis of the information at human splice sites. *J. Mol. Biol.* *228*, 1124–  
759 1136.

760 Sun, W., Samimi, H., Gamez, M., Zare, H., and Frost, B. (2018). Pathogenic tau-induced  
761 piRNA depletion promotes neuronal death through transposable element dysregulation in  
762 neurodegenerative tauopathies. *Nat. Neurosci.* *21*, 1038–1048.

763 Treiber, C.D., and Waddell, S. (2017). Resolving the prevalence of somatic transposition in  
764 *Drosophila*. *Elife* *6*, e28297

765 Upton, K.R., Gerhardt, D.J., Jesuadian, J.S., Richardson, S.R., Sánchez-Luque, F.J.,  
766 Bodea, G.O., Ewing, A.D., Salvador-Palomeque, C., Van Der Knaap, M.S., Brennan, P.M.,  
767 et al. (2015). Ubiquitous L1 mosaicism in hippocampal neurons. *Cell* *161*, 228–239.

768 Wan, H.I., DiAntonio, A., Fetter, R.D., Bergstrom, K., Strauss, R., and Goodman, C.S.  
769 (2000). Highwire regulates synaptic growth in *Drosophila*. *Neuron* *26*, 313–329.

770 Wang, Z., Berkey, C.D., and Watnick, P.I. (2012). The *Drosophila* Protein Mustard Tailors  
771 the Innate Immune Response Activated by the Immune Deficiency Pathway. *J. Immunol.*  
772 *188*, 3993–4000.

773 Zhang, W., Wu, J., Ward, M.D., Yang, S., Chuang, Y.A., Xiao, M., Li, R., Leahy, D.J., and  
774 Worley, P.F. (2015). Structural basis of arc binding to synaptic proteins: Implications for  
775 cognitive disease. *Neuron* *86*, 490–500.

776



777 **Supplemental figures**

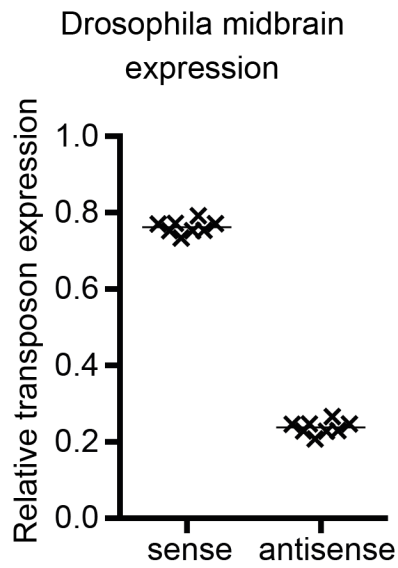

778

779

780 **Supplemental figure 1. Sense strand transposon transcripts are twice as abundant as**  
781 **antisense strand transcripts in the *Drosophila* midbrain.**

782 Graph showing mean expression levels across the entire midbrain of all sense and  
783 antisense transposon sequences. Each data point (cross) represents one biological  
784 replicate.

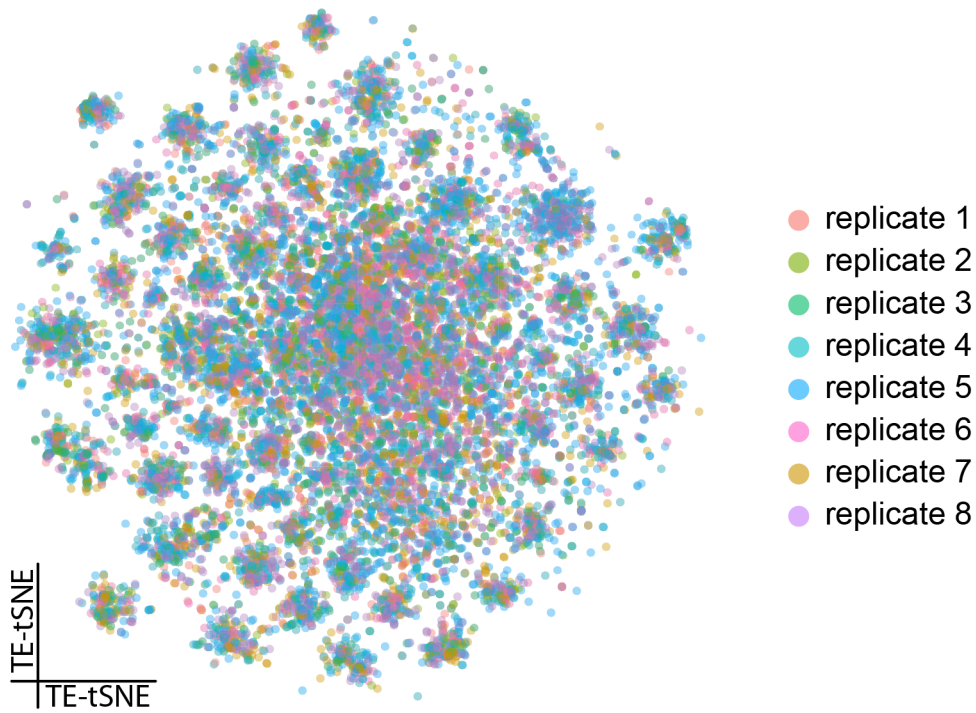

785

786

787 **Supplemental figure 2. Transposon expression patterns are stereotyped across**

788 **biological replicates.**

789 tSNE based on transposon expression levels showing all 8 biological replicates. Each

790 replicate contributes cells to each cluster.

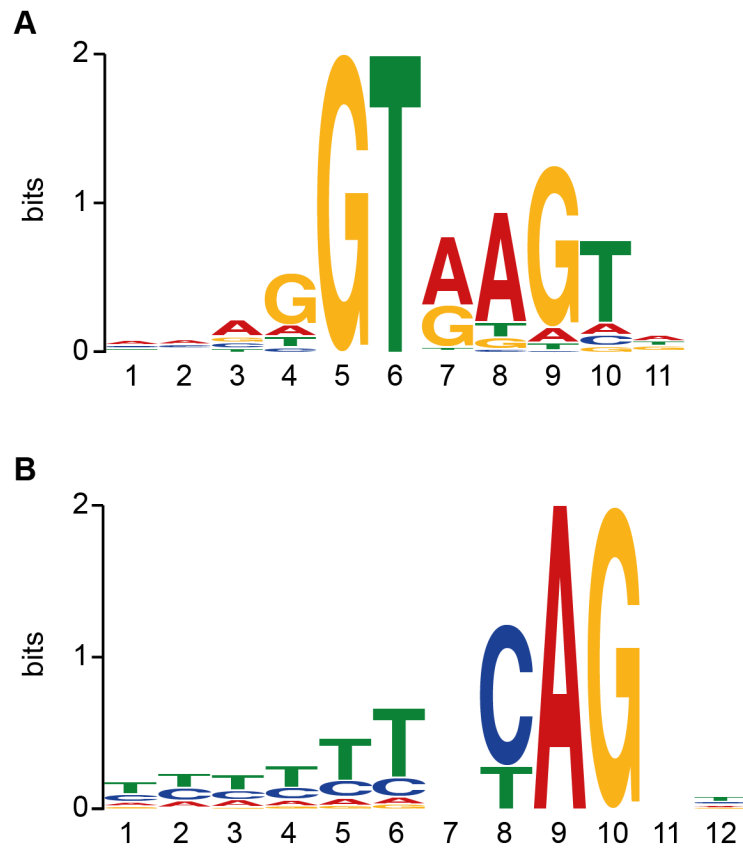

791

792

793 **Supplemental figure 3. Splice acceptor and donor motifs.**

794 **A** Splice acceptor motif, taken from 500 randomly chosen exon-intron junctions of

795 *Drosophila* genes. **B** splice donor motif.

original *Dscam2* transcript:

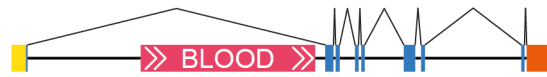

new *Dscam2* variant:

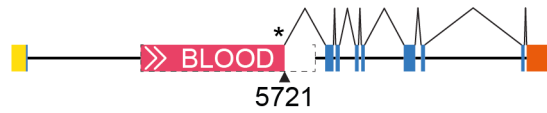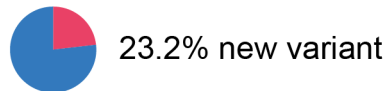

\*in frame with BLOOD ORF2

796

797

798 **Supplemental figure 4. Sense BLOOD insertion in *Dscam2*.**

799 Schematics of *DScam2* mRNAs produced from locus containing BLOOD. Top shows the  
800 nascent transcript spliced around the intronic full-length sense BLOOD insertion. Bottom  
801 illustrates a new mRNA splice isoform, which reads through in frame from the ORF2  
802 sequence of BLOOD into exon 2 of *DScam2*. The breakpoint in BLOOD is a consensus SD  
803 motif. 23.2% of all *Dscam2* transcripts in fly heads are chimeric with BLOOD.

original *teq* transcripts:

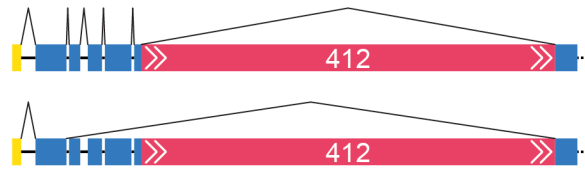

new *teq* variants:

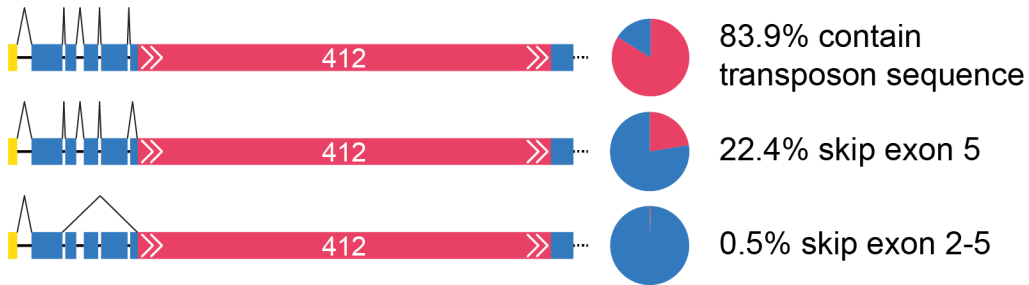

804

805

806 **Supplemental figure 5. Sense 412 insertion in *tequila*.**

807 Schematics of *teq* mRNAs produced from locus containing full-length sense orientation 412

808 insertion. Top, original transcripts of *teq* splicing around 412. Bottom, and new *teq* splice

809 isoforms that include 412 sequence. 83.9% of *teq* transcripts contain 412 transposon

810 sequence. In addition, 22.4 % of 412 containing mRNAs skip exon 5 of *teq*. In 0.5% of cases

811 exons 2-5 are skipped.

original *CG31705* transcript:

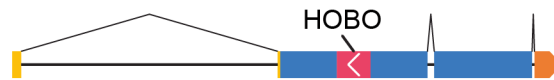

new *CG31705* variants:

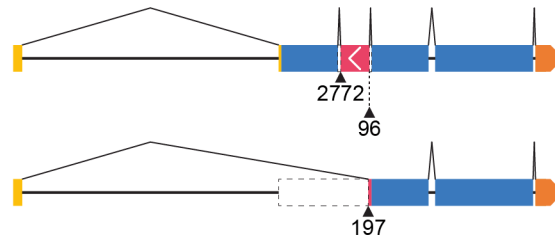

812

813

814 **Supplemental figure 6. Antisense HOBO insertion in *CG31705*.**

815 Schematic of *CG31705* mRNAs produced from locus containing exonic antisense HOBO

816 insertion. Transcripts containing unspliced HOBO and two additional new splice isoforms

817 that are generated by alternative splicing into HOBO are shown.

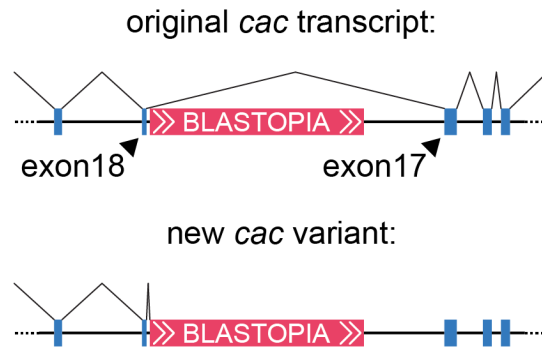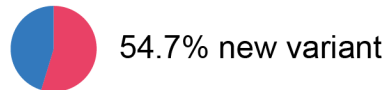

818

819

820 **Supplemental figure 7. Sense BLASTOPIA insertion in *cacophony*.**

821 Schematic *cac* transcripts produced from locus containing a full-length intronic sense

822 BLASTOPIA insertion (the orientation is 5' (left) to 3' (right)). A regular *cac* transcript is

823 produced by splicing around the BLASTOPIA insertion and a new truncated *cac* isoform

824 results from splicing into BLASTOPIA. The *cac* gene is on the X chromosome, and 54.7% of

825 *cac* transcripts in the fly head are truncated by splicing into BLASTOPIA.

original *Bx* transcript:

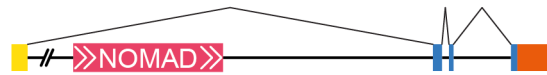

new *Bx* variants:

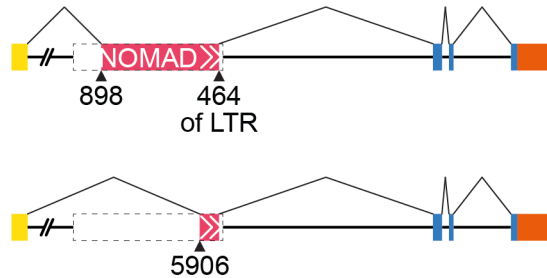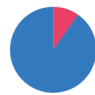

9.8% new variant

826

827

828 **Supplemental figure 8. Sense NOMAD insertion in *Bx*.**

829 Schematic showing mRNAs produced from locus containing sense intronic NOMAD  
830 insertion. Original transcript of *Bx* is generated by splicing around NOMAD. New splice  
831 isoforms contain fragments of NOMAD. 9.8% of transcripts that start with the *Bx* 5'UTR are  
832 spliced into NOMAD.
